# Supplementary material
Source: PubMed Central journal article supplement (PMC11225589)
Supplement: NIHMS2002439-supplement-Supp_Material_1.pdf [file NIHMS2002439-supplement-Supp_Material_1.pdf]

529 patients with HER2-positive invasive breast cancer diagnosed by core needle biopsy with palpable breast mass  $\geq 2.0$  cm

Stratification

- tumor size by physical exam (2.0-4.0 cm,  $>4.0$  cm)
- clinical nodal status (negative, positive)
- hormone receptor status (ER-positive and/or PgR-positive, ER- and PgR-negative)
- age ( $<50$ ,  $\geq 50$ )

Random assignment

181 patients  
Arm 1: AC $\rightarrow$ WP+T

2 patients withdrew consent without follow-up

179 patients with follow-up and were included in analyses  
2 patients without clinical assessment on cancer recurrence  
1 patient withdrew consent

174 patients  
Arm 2: AC $\rightarrow$ WP+L

3 patients withdrew consent without follow-up

171 patients with follow-up and were included in analyses  
2 patients withdrew consent

174 patients  
Arm 3: AC $\rightarrow$ WP+TL

2 patients withdrew consent without follow-up

172 patients with follow-up and were included in analyses  
1 patient without clinical assessment on cancer recurrence  
4 patients withdrew consent
